# Supplementary material
Source: Springer Nature journal article supplement (https://www.springermedizin.de/resource/supplementary/12911_2011_571_MOESM2_ESM.pdf/9526140)
Supplement: MOESM2 [file 9526140]

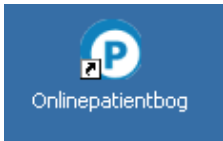

Onlinepatientbog

**Public section**

**Nine subsections:** General information and advices

**Links:** Pictures, Pamphlets, Websites

**Personal section**

**Four subsections:** Nurses notes, Individualized information

**Two subsections:** Patient's Personal Notes, Closed for others

**Dialogues: Two subsections**

Dialogues between one patient and healthcare professionals at the wards

Dialogues between a group of patients, Closed for others
